# Supplementary material for: The distribution of mitochondrial DNA haplogroup H in southern Iberia indicates ancient human genetic exchanges along the western edge of the Mediterranean
Source: PubMed Central journal article supplement (PMC5437654; doi:10.1186/s12863-017-0514-6), 2017-05-19

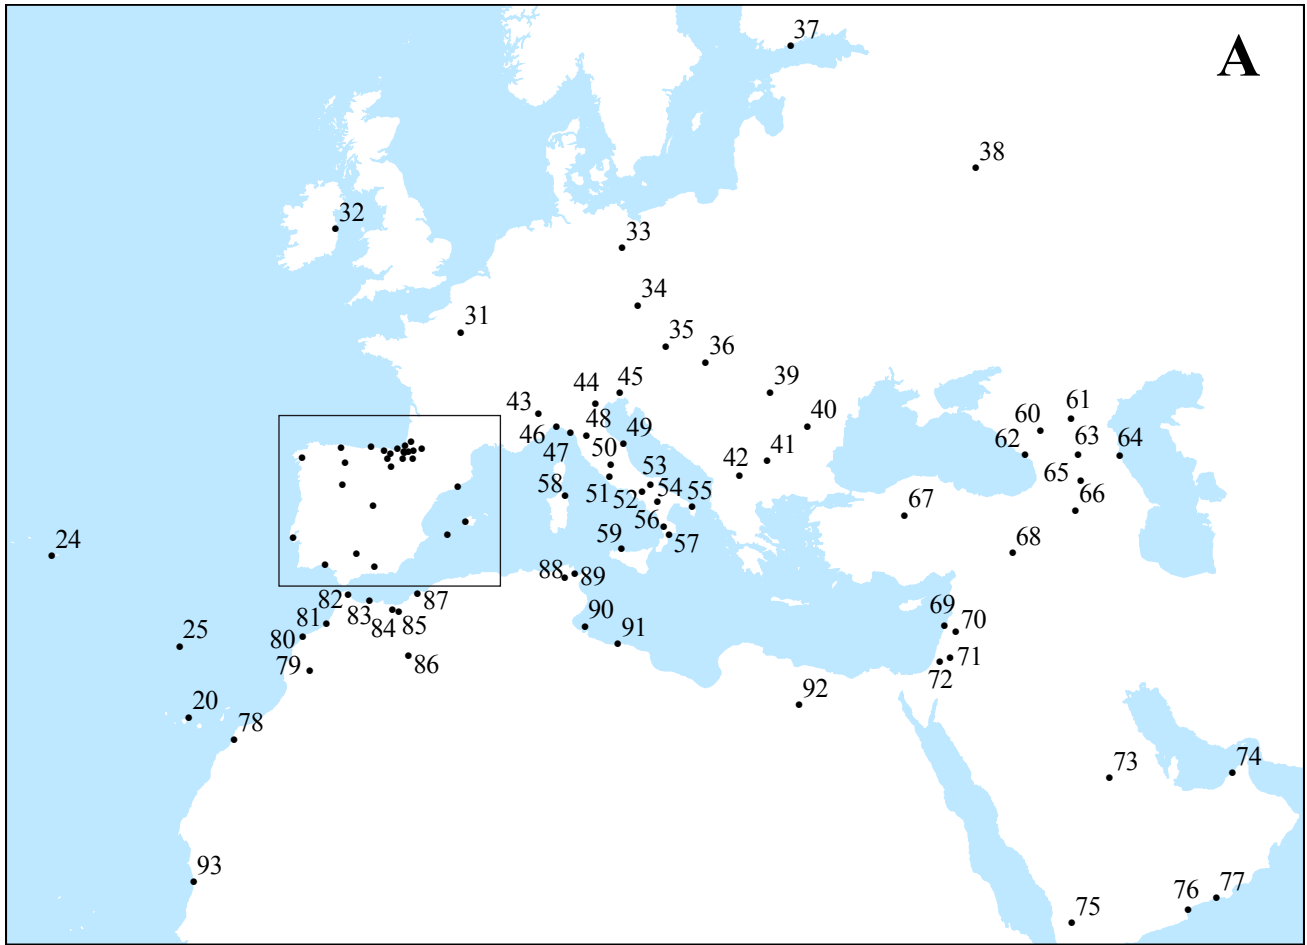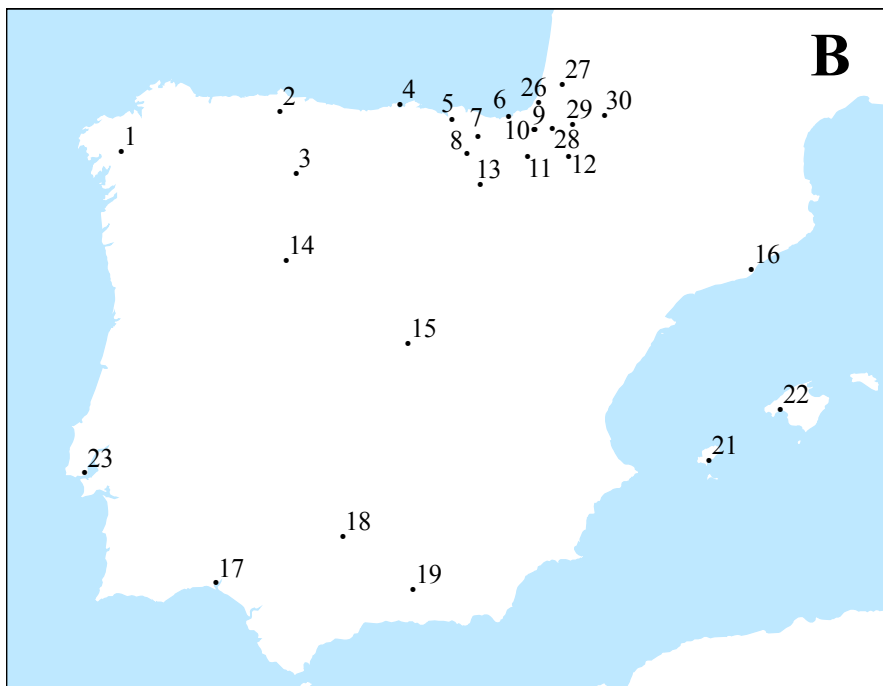

Supplement: 12863_2017_514_MOESM5_ESM.pdf [file 12863_2017_514_MOESM5_ESM.pdf]
